# Supplementary material for: Effect of restrictions imposed due to COVID-19 pandemic on the antenatal care and pregnancy outcomes: a prospective observational study from rural North India
Source: HighWire-hosted journal article supplement (doi:10.1136/bmjopen-2021-059701), 2022-04-01
Supplement: bmjopen-2021-059701supp001_data_supplement.pdf [file bmjopen-2021-059701supp001_data_supplement.pdf]

*Appendix 1***Department of Obstetrics & Gynaecology, AIIMS, Bathinda****Project title: Effect of restrictions imposed due to COVID-19 pandemic on the antenatal care and pregnancy outcomes- a prospective observational study from rural North India.****A. Socio-Demographic Characteristics**

|     |                                                                                                                                                                                       |                                                                                                                                                                                                                                                                                                                                                                                     |
|-----|---------------------------------------------------------------------------------------------------------------------------------------------------------------------------------------|-------------------------------------------------------------------------------------------------------------------------------------------------------------------------------------------------------------------------------------------------------------------------------------------------------------------------------------------------------------------------------------|
| 1.  | District                                                                                                                                                                              |                                                                                                                                                                                                                                                                                                                                                                                     |
| 2.  | Name of Interviewer:                                                                                                                                                                  |                                                                                                                                                                                                                                                                                                                                                                                     |
| 3.  | Date of interview:                                                                                                                                                                    |                                                                                                                                                                                                                                                                                                                                                                                     |
| 4.  | UID:                                                                                                                                                                                  |                                                                                                                                                                                                                                                                                                                                                                                     |
| 5.  | Name of the respondent (आपका नाम):                                                                                                                                                    |                                                                                                                                                                                                                                                                                                                                                                                     |
| 6.  | Husband Name(पति का नाम):                                                                                                                                                             |                                                                                                                                                                                                                                                                                                                                                                                     |
| 7.  | Age of the client.....<br>आपकी उम्र कितनी है?                                                                                                                                         | 1. 15-20 years<br>3. 31-40 years<br>2. 21-30 years<br>4. >40 years                                                                                                                                                                                                                                                                                                                  |
| 8.  | Age of the spouse.....<br>आपके पति की उम्र कितनी है ?                                                                                                                                 | 1. 15-20 years<br>3. 31-40 years<br>2. 21-30 years<br>4. >40 years                                                                                                                                                                                                                                                                                                                  |
| 9.  | Address (आपका पता क्या है?):                                                                                                                                                          |                                                                                                                                                                                                                                                                                                                                                                                     |
| 10. | Locality of the Area:                                                                                                                                                                 | 1. Urban    2. Slum    3. Rural                                                                                                                                                                                                                                                                                                                                                     |
| 11. | Phone Number (Relation with client) (फोन नंबर, महिला से संबंध)<br>1..... 2..... 3.....<br>(Self /खुद का)                      (Spouse/पति)                      (Other specify/ अन्य) |                                                                                                                                                                                                                                                                                                                                                                                     |
| 12. | Up to what level have you studied?<br>आपने कहाँ तक पढाई की है?                                                                                                                        | 1. MA Pass or higher education (MA पास या उच्च शिक्षा)<br>2. Graduate (स्नातक/ बी. ए.)<br>3. Intermediate or post-high school diploma (12वीं या कोई और कोर्स)<br>4. High school certificate(दस पास)<br>5. Middle school certificate (आठवीं पास)<br>6. Primary school certificate(पाँचवी पास)<br>7. Less than Primary school certificate(पाँचवी पास से कम)<br>8. Illiterate (अनपढ़)  |
| 13. | Up to what level has your husband studied?<br>आपके पति ने कहाँ तक पढाई की है?                                                                                                         | 1. MA Pass or higher education (MA पास या उच्च शिक्षा)<br>2. Graduate (स्नातक/ बी. ए.)<br>3. Intermediate or post-high school diploma (12 वीं या कोई और कोर्स)<br>4. High school certificate(दस पास)<br>5. Middle school certificate (आठवीं पास)<br>6. Primary school certificate(पाँचवी पास)<br>7. Less than Primary school certificate(पाँचवी पास से कम)<br>8. Illiterate (अनपढ़) |
| 14. | What do you do?<br>आप क्या काम करते हो?                                                                                                                                               |                                                                                                                                                                                                                                                                                                                                                                                     |
| 15. | If you were working, were you earning during the lockdown                                                                                                                             |                                                                                                                                                                                                                                                                                                                                                                                     |
| 16. | What is your husband doing?                                                                                                                                                           |                                                                                                                                                                                                                                                                                                                                                                                     |

|     |                                                                                                                              |                                                 |
|-----|------------------------------------------------------------------------------------------------------------------------------|-------------------------------------------------|
|     | आपके पति क्या काम करते हैं?                                                                                                  |                                                 |
| 17. | Was he earning during the lockdown                                                                                           |                                                 |
| 18. | What type of family do you have?<br>आपका परिवार किस तरह का है?                                                               | 1. Nuclear (एकल परिवार)      2. Joint (संयुक्त) |
| 19. | How many family members are there in your family?<br>आपके परिवार में कितने सदस्य हैं?                                        |                                                 |
| 20. | What is total monthly income of your family?<br>आपके परिवार की महीने की आमदनी कितनी है?                                      | Approx .....                                    |
| 21. | What is the per capita monthly family income?<br><b>(Not to be Asked)</b> आपके परिवार की प्रति व्यक्ति मासिक आमदनी कितनी है? |                                                 |
| 22. | Do you have below poverty line card (BPL card)?<br>क्या आपके पास गरीबी रेखा के नीचे कार्ड (पीला कार्ड) है?                   | 1. Yes (हाँ)      2. No (नहीं)                  |

## B. Obstetrics and Clinical History

|     |                                                                                              |                           |
|-----|----------------------------------------------------------------------------------------------|---------------------------|
| 23. | How many children are ever born by you?<br>अब तक आपके कितने बच्चे पैदा हुए हैं?              |                           |
| 24. | How many living children do you have?<br>आपके कितने बच्चे हैं?                               |                           |
| 25. | How many living male children do you have?<br>आपके कितने लड़के हैं?                          |                           |
| 26. | How many living female children do you have?<br>आपके कितनी लड़कियाँ हैं?                     |                           |
| 27. | What is the age of the youngest child (in months)?<br>आपके सबसे छोटे बच्चे की उम्र कितनी है? |                           |
| 28. | Obstetric history                                                                            | G      P      L      A    |
| 29. | Are you currently pregnant                                                                   | 1. Yes      2. No         |
| 30. | If yes, Was this pregnancy                                                                   | Planned      2. Unplanned |
| 31. | If unplanned, did you continue this pregnancy?                                               | 1. Yes      2. No         |
| 32. | If yes, reason for continuation of unplanned pregnancy?                                      |                           |
| 33. |                                                                                              | LMP      EDD      POG     |

| C. Effect of Lockdown on Ante-natal care and delivery |                                                                                      |                   |
|-------------------------------------------------------|--------------------------------------------------------------------------------------|-------------------|
|                                                       | <b>ANTENATAL CARE</b>                                                                |                   |
| 34.                                                   | Did you face any difficulties in accessing healthcare services during this lockdown? | 1. Yes      2. No |
| 35.                                                   | At what period of gestation, did you first visit the hospital?                       |                   |

|     |                                                                               |                                                                                          |
|-----|-------------------------------------------------------------------------------|------------------------------------------------------------------------------------------|
| 36. | How many times did you visit hospital during the lockdown?                    | 0/1/2/3/4/5/>5 times                                                                     |
| 37. | What type of difficulty did you face?                                         | 1.transport. 2.healthcare provider 3.Nutrition<br>4.supplements. 5.investigations. 6.USG |
| 38. | Did you face any difficulty in immunization against tetanus?                  | 1.Yes 2.No                                                                               |
| 39. | Did you have any problem in getting antenatal investigations due to lockdown? | 1.Yes 2.No                                                                               |
|     | How many times were you tested for                                            |                                                                                          |
| 40. | Weight gain                                                                   | 0/1/2/3/4/5/>5 times                                                                     |
| 41. | BP                                                                            | 0/1/2/3/4/5/>5 times                                                                     |
| 42. | Hemoglobin                                                                    | 0/1/2/3/4/5/>5 times                                                                     |
| 43. | Blood sugar                                                                   | 0/1/2/3/4/5/>5 times                                                                     |
| 44. | Urine for sugar and proteins                                                  | 0/1/2/3/4/5/>5 times                                                                     |
| 45. | Blood group                                                                   | Yes No                                                                                   |
| 46. | VDRL                                                                          | Yes No                                                                                   |
| 47. | Hep-B                                                                         | Yes No                                                                                   |
| 48. | HIV                                                                           | Yes No                                                                                   |
| 49. | HCV                                                                           |                                                                                          |
| 50. | USG for fetal well being                                                      | 0/1 /2 /3 / >3 times                                                                     |
| 51. | USG at which period of gestation?                                             | 1.Dating(T1) 2.Level II USG(T2) 3.Growth scan(T3)                                        |
| 52. | Did you face any difficulty in getting USG done?                              |                                                                                          |
| 53. | Did Asha worker visit you at home during the lockdown?                        | Yes No                                                                                   |
| 54. | Were there any pregnancy related complications                                | Yes No                                                                                   |
| 55. | Anemia                                                                        |                                                                                          |
| 56. | Hyperemesis gravidarum                                                        |                                                                                          |
| 57. | HTN                                                                           | Yes No                                                                                   |
| 58. | DM                                                                            |                                                                                          |
| 59. | Antepartum hemorrhage                                                         |                                                                                          |
| 60. | Preterm labor                                                                 |                                                                                          |
| 61. | Premature rupture of membranes                                                |                                                                                          |

|     |                                                         |                                                                  |
|-----|---------------------------------------------------------|------------------------------------------------------------------|
|     | <b>At the time of Delivery</b>                          |                                                                  |
| 62. | Where did u plan your delivery                          | 1. Govt hospital<br>2. Private hospital<br>3. Did not plan       |
| 63. | where did you finally deliver                           | 4. At your planned place<br>5. Some other hospital<br>6. At home |
| 64. | If you deliver at some other place, what was the reason | 7. Were you referred, y/n<br>8. If yes, reason _____             |

|     |                                                                                                               |                                                                                                                                                                                                                    |
|-----|---------------------------------------------------------------------------------------------------------------|--------------------------------------------------------------------------------------------------------------------------------------------------------------------------------------------------------------------|
| 65. | Was there any need of blood transfusion during delivery??                                                     | 1.Yes                      2.No                                                                                                                                                                                    |
| 66. | What was the total duration of hospital stay during delivery?<br>डिलीवरी के बाद अस्पताल मे कितने दिन रुके थे? | 1. within one hour<br>2. after one day<br>3. after two days<br>4. after three days<br>5. after 4 days<br>6. after 6 days<br>7. Currently in hospital after delivery.<br>(डिलीवरी के बाद अभी भी आप अस्पताल में हैं) |
|     | <b>Outcome of the pregnancy</b>                                                                               |                                                                                                                                                                                                                    |
| 67. | What was the outcome of the pregnancy                                                                         | 1. Live birth<br>2. Still birth<br>3. Abortion                                                                                                                                                                     |
| 68. | <b>If ans. to the question 63 is a live birth</b>                                                             |                                                                                                                                                                                                                    |
|     | Mode of birth                                                                                                 | 1. NVD<br>2. LSCS                      3. Instrumental(Forceps/ventouse)                                                                                                                                           |
| 69. | Period of gestation at birth                                                                                  | 1. full term<br>2. pre-term<br>3. post-term                                                                                                                                                                        |
| 70. | Was the baby attended by a pediatrician at the time of birth                                                  |                                                                                                                                                                                                                    |
| 71. | Was breastfeeding initiated within half hour of NVD and 6 hrs of LSCS                                         |                                                                                                                                                                                                                    |
| 72. | Was colostrum given to baby                                                                                   |                                                                                                                                                                                                                    |
| 73. | Was pre-lacteal feeds given to baby                                                                           |                                                                                                                                                                                                                    |
| 74. | Were you taught about breastfeeding, latching, and kangaroo mother care practices.                            |                                                                                                                                                                                                                    |
| 75. | Was the birth registered within 14 days for birth certificate                                                 | 1.Yes                      2.No                                                                                                                                                                                    |
| 76. | If the baby was preterm, did the baby need NICU admission?                                                    | Yes                      No                                                                                                                                                                                        |
| 77. | Did you face any difficulty with NICU admission?                                                              |                                                                                                                                                                                                                    |
| 78. | <b>If it was an abortion</b>                                                                                  | 1. Induced<br>2. Spontaneous                                                                                                                                                                                       |
| 79. | Did you visit the hospital for the same?                                                                      |                                                                                                                                                                                                                    |
| 80. | Did u face any difficulty to access healthcare facility?                                                      |                                                                                                                                                                                                                    |
|     | <b>POST PARTUM PERIOD</b>                                                                                     |                                                                                                                                                                                                                    |
| 81. | How was your post-partum period                                                                               | Eventful                      uneventful                                                                                                                                                                           |
| 82. | Did you face any complication                                                                                 | 1.Yes                      2.No                                                                                                                                                                                    |
| 83. | If yes, what were they                                                                                        | 1. genital    3. Breast,    3. Systemic    4.Wound                                                                                                                                                                 |
| 84. | Were they attended                                                                                            | 1.Yes                      2.No                                                                                                                                                                                    |
| 85. | Who attended to those complications                                                                           | 1. specialist. 2. Medical officer. 3.Nurse, 4. ANM, 5. ASHA 5. Others                                                                                                                                              |
| 86. | How was it attended                                                                                           | 1. OPD basis<br>2. Hospitalization    3. Teleconsultation                                                                                                                                                          |
| 87. | Did any health worker visit you at home in the post-natal period?                                             | 1.Yes                      2.No                                                                                                                                                                                    |

|     |                                                                                  |                                                  |
|-----|----------------------------------------------------------------------------------|--------------------------------------------------|
| 88. | Were you told about the danger signs of the new-born and the post-partum period. | 1.Yes          2.No          3. NA               |
| 89. | Did you plan any family planning services.                                       | 1.Yes          2.No                              |
| 90. | If yes, what was the method?                                                     | 1. temporary          2. permanent               |
| 91. | If temporary                                                                     | 1. POP    2. Barriers,    3. IUCD    4.ANY OTHER |
| 92. | Did you adopt those methods                                                      | 1. yes 2. NO                                     |
| 93. | Were you told about their benefits and side-effects                              |                                                  |
| 94. | If permanent                                                                     | 1. tubectomy 2. vasectomy                        |
| 95. | Did you face any difficulty?                                                     | 1.Yes          2.No                              |
| 96. | If yes, what type of difficulty did you face?                                    |                                                  |
| 97. | Was the new-born vaccinated as per UIP (Universal Immunization Program)          |                                                  |
| 98. | If yes, where was the vaccination done                                           | 9. Government set-up<br>10. Private              |
| 99. | What was your experience of delivery during lockdown?                            |                                                  |

| S. no | Questions related to satisfaction                           |                   |
|-------|-------------------------------------------------------------|-------------------|
| 100.  | Do you know what is teleconsultation?                       |                   |
| 101.  | Did you have accessibility to smart phone?                  |                   |
| 102.  | Did you take teleconsultation?                              |                   |
| 103.  | From where did you take it?                                 |                   |
| 104.  | Did you face any difficulty in taking teleconsultation      |                   |
| 105.  | What was the mode of teleconsultation                       | Audio/visual/both |
| 106.  | Do you know how to email?                                   | Yes               |
| 107.  | Ease of seeking appointment                                 |                   |
| 108.  | The voice/video quality of the service                      |                   |
| 109.  | How much did the doctor show concern towards your problems? |                   |
| 110.  | The explanation of your problem by the doctor               |                   |
| 111.  | The explanation of the treatment                            |                   |
| 112.  | The advice for follow up                                    |                   |

|      |                                                                                                 |  |
|------|-------------------------------------------------------------------------------------------------|--|
| 113. | Were you relieved of your problems?                                                             |  |
| 114. | Did the doctor ever say that you need to come to hospital for definite diagnosis and treatment? |  |
| 115. | Benefits of tele-consultation                                                                   |  |
| 116. | Shortcomings of tele-consultation services                                                      |  |
| 117. | the clarity of the prescription provided to you                                                 |  |
| 118. | Did you face any difficulty in getting medicines with the help of that prescription slip?       |  |
| 119. | Would you like to use telemedicine again?                                                       |  |
| 120. | Overall, how satisfied were you with last telemedicine session?                                 |  |
| 121. | Do you think your telemedicine session was as good as an ordinary in-person visit?              |  |
| 122. | Would you recommend this service to your knowns                                                 |  |

#### A. Knowledge and perceptions about pregnancy and COVID 19

|      |                                                                                         |                                                                                 |
|------|-----------------------------------------------------------------------------------------|---------------------------------------------------------------------------------|
| 123. | Do u know what is coronavirus?                                                          | 1.Yes          2. No                                                            |
| 124. | Are you aware about the symptoms of coronavirus infection? If no, skip question no. 38. | 1.Yes          2.No<br>If yes, specify                                          |
| 125. | What are the symptoms of this infection?                                                | 1.cough   2.fever.   3.sore throat.<br>4.sneezing.   5.malaise.   6. diarrhoea  |
| 126. | Do u know about the modes of transmission?                                              | 1.Yes          2.No                                                             |
| 127. | Do u know about the preventive measures? If no, skip question no. 41.                   | 1.Yes          2.No                                                             |
| 128. | Which preventive measures do u practice?                                                | 1.face mask   2.frequent hand washing.<br>3.sanitisation.   4.social distancing |
| 129. | Were you apprehensive about the situation of lockdown?                                  | 1.Yes          2.No                                                             |
| 130. | Are you afraid of catching this infection?                                              | 1.Yes          2.No                                                             |
| 131. | Are you afraid of your fetus getting this infection?                                    | 1.Yes          2.No                                                             |

## B. COVID testing of pregnant women before and during delivery

|      |                                                                            |                                         |
|------|----------------------------------------------------------------------------|-----------------------------------------|
| 132. | Did u have coronavirus infection?                                          | 1.Yes 2.No                              |
| 133. | If yes, at what period of gestation?                                       |                                         |
| 134. | What were the symptoms?                                                    |                                         |
| 135. | Were you tested for COVID-19 at the time of delivery.                      | 1.Yes 2.No                              |
| 136. | What was the result of the test                                            | 11. Positive 2. Negative. 3. Don't know |
| 137. | If positive, were you quarantined                                          | 1.Yes 2.No                              |
| 138. | Was you baby also tested                                                   | 1.Yes 2.No                              |
| 139. | What was the result of the test                                            | Positive 2. Negative. 3. Don't know     |
| 140. | Did the behavior of the staff changed because of the positive test results | 1.Yes 2.No                              |
| 141. | If yes, do you believe that your pregnancy was not handled properly?       | 1.Yes 2.No                              |
| 142. | If you were tested positive, were you referred to other centre?            |                                         |
| 143. | If yes, where                                                              |                                         |
| 144. | Did you face any problem in transport                                      |                                         |
| 145. | Did you face any problem in getting admission                              |                                         |

|      |                                                               |            |
|------|---------------------------------------------------------------|------------|
| 146. | Do you think your diet was affected during the lockdown       | 1.Yes 2.No |
| 147. | If yes, do you think you were undernourished during lock down | 1.Yes 2.No |
| 148. | If yes, the diet was deficient in                             |            |
| 149. | Fruits                                                        |            |
| 150. | vegetables                                                    |            |
| 151. | Dairy products                                                |            |
| 152. | Oil and ghee                                                  |            |
| 153. | Pulses (dals)                                                 |            |
| 154. | cereals                                                       |            |
| 155. | Nuts                                                          |            |
| 156. | Did you have to spend extra to procure these items            |            |

|      |                                                                                         |       |               |
|------|-----------------------------------------------------------------------------------------|-------|---------------|
| 157. | Did you face any difficulty in receiving iron/calcium?                                  | 1.Yes | 2.No          |
| 158. | Did you maintain the dose that was initially prescribed to you?                         | 1.Yes | 2.No. 3. NA   |
| 159. | Did you ever skip your iron/Ca because you had fear that you may not get them again     | 1.Yes | 2.No          |
| 160. | Did you ever purchased your supplements.                                                | 1.Yes | 2.No          |
| 161. | Were you registered in anganwadi during pregnancy for mid-day meal/dietary supplements? | 1.Yes | 2.No          |
| 162. | If yes, did you get your meals during lockdown                                          | 1.Yes | 2.No          |
| 163. | If no, did you get any help                                                             | Govt  | NGO any other |
